# Supplementary material for: Revealing uranium tetrafluoride microrods
Source: Royal Society of Chemistry journal article supplement (doi:10.1039/d4ma00796d), 2024-01-01
Supplement: d4ma00796d1.pdf [file d4ma00796d1.pdf]

## Electronic Supplementary Information

### Revealing Uranium Tetrafluoride Microrods

Harry Jang<sup>a</sup> and Frederic Poineau<sup>\*a</sup>

<sup>a</sup>Department of Chemistry & Biochemistry, University of Nevada, Las Vegas, Las Vegas, Nevada 89154, United States

\*Corresponding author: poineauf@unlv.nevada.edu

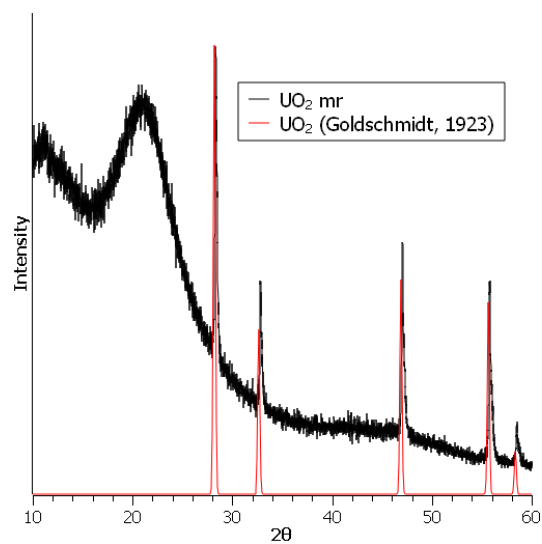

**Fig. S1** PXRD of the UO<sub>2</sub> mr starting material.

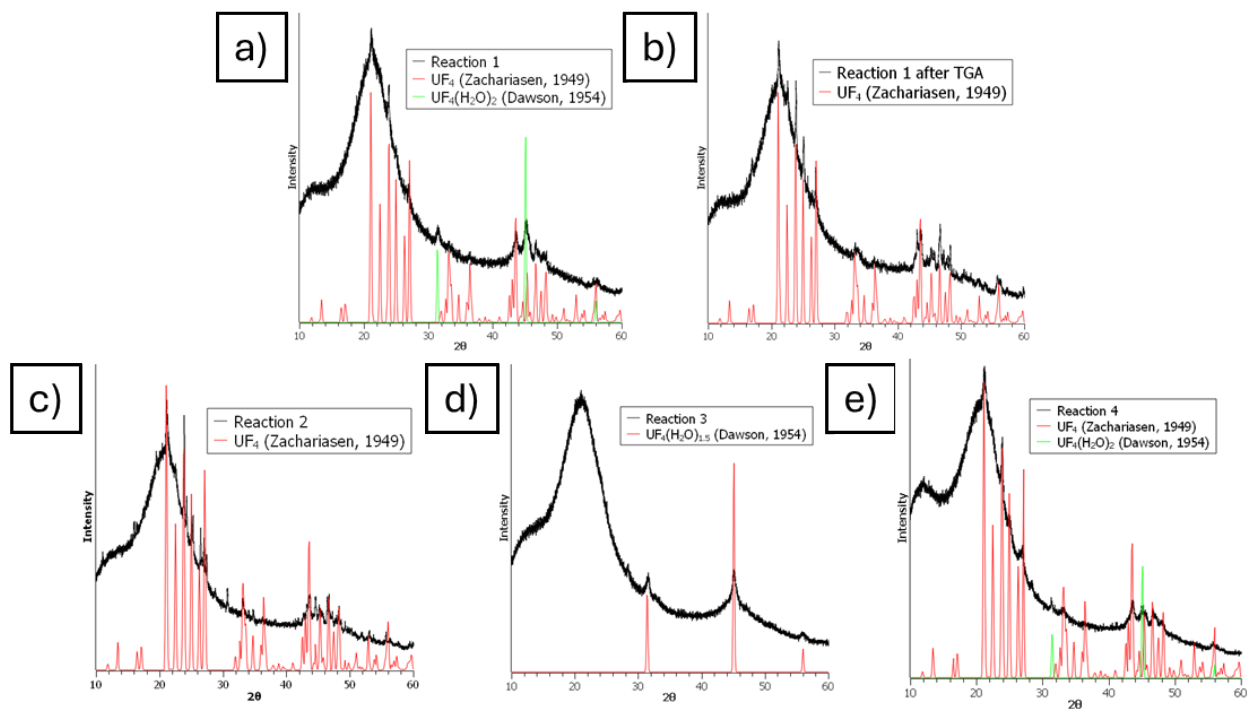

**Fig. S2** XRD patterns resulting from a) reaction 1, b) reaction 1 after TGA-DSC, c) reaction 2, d) reaction 3, and e) reaction 4.

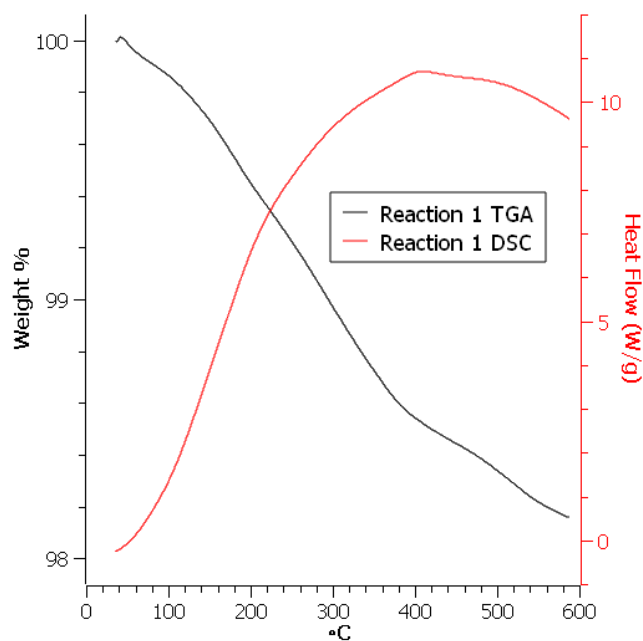

**Fig. S3** TGA-DSC of the results of reaction 1.
